# Supplementary material
Source: publisher site journal article supplement (https://www.dovepress.com/article/463546)
Supplement: Supplementary file 1 [file get_supplementary_file.php]

**Supplementary Figure S1.** Maps of mRNA vaccine constructs. (A) The map of pT7AG-RBD-mC3-pA. This construct was for RBD-mC3 mRNA production. (B) The map of pT7AG-RBD-mFc-pA. This construct was for RBD-mFc mRNA production. (C) The map of pT7AG-RBD-pA. This construct was for RBD mRNA production. Every construct involves a T7 promoter, a 5’UTR, an open reading frame, a 3’UTR, and a segmented polyA tail.

**Supplementary Table S1.** Encapsulation efficiency of mRNA-LNP. The amount of RBD mRNA was quantified before encapsulation into LNPs (input). Then, the mRNA was extracted and purified from the LNPs, and its quantity was measured again (output). Encapsulation efficiency was calculated as the ratio of output to input and expressed as a percentage. Eight batches of mRNA-LNP were used to determine encapsulation efficiency.

| 1. **Batch** | 1. **Input** 2. **(µg)** | 1. **Output** 2. **(µg)** | 1. **Encapsulation efficiency** 2. **(%)** |
| --- | --- | --- | --- |
| 1. **#1** | 1. 8.0 | 1. 8.0 | 1. 100.0 |
| 1. **#2** | 1. 8.0 | 1. 7.9 | 1. 98.8 |
| 1. **#3** | 1. 4.0 | 1. 3.9 | 1. 97.5 |
| 1. **#4** | 1. 4.0 | 1. 3.8 | 1. 95.0 |
| 1. **#5** | 1. 4.0 | 1. 3.9 | 1. 97.5 |
| 1. **#6** | 1. 4.0 | 1. 3.9 | 1. 97.5 |
| 1. **#7** | 1. 2.0 | 1. 1.9 | 1. 95.0 |
| 1. **#8** | 1. 8.0 | 1. 7.9 | 1. 98.8 |
| 1. **Average** | 1. 5.25 | 1. 5.15 | 1. **98.1** |
